# Supplementary material for: The NagY regulator: A member of the BglG/SacY antiterminator family conserved in Enterococcus faecalis and involved in virulence
Source: PubMed Central journal article supplement (PMC9981650; doi:10.3389/fmicb.2022.1070116), 2023-02-17
Supplement: Data_Sheet_1.pdf [file Data_Sheet_1.pdf]

## Supplementary Material and Methods

### 1 Supplementary Methods

#### Growth experiments

*E. faecalis* overnight cultures in GM17 were washed with carbon depleted medium cdM17 (La Carbona et al., 2007) and the OD<sub>600</sub> was adjusted to 0.02 in cdM17. The cultures were then performed in microplate, with media supplemented with 0.5% glucose, N-acetylglucosamine (NAG), or hyaluronic acid, chondroitin sulfate or heparin sodium sonicated 15 min, and incubated at 37°C for 24 h in anaerobic conditions. The OD was measured using a Model 680 Microplate reader (Bio-Rad, Hercules, California, USA).

#### RT-PCR

Reverse Transcription for RT-PCR assay to verify *nagY* and *nagE* cotranscription was performed using QuantiTect Reverse Transcription kit (Qiagen) and GoTaq DNA Polymerase (Promega) with ef1515RTL and ef1516RTR oligonucleotides (Supplementary Table 2).

#### RACE-PCR

5'RACE-PCR were performed using the 5'/3' RACE kit, 2<sup>nd</sup> generation (Roche), with poly-A/C/G tailing. PCR were performed using Phusion High-Fidelity DNA Polymerase (ThermoFisher), with primers ef1515R, ef1515\_SP2, ef1515\_SP3 and ef3023\_SP1, ef3023\_SP2, ef3023\_SP3 for *nagY* and *hyla*, respectively (Supplementary table 2). PCR products were purified when necessary, using the NucleoSpin Gel and PCR Clean-up kit (Macherey-Nagel) and plasmid extractions were achieved with the NucleoSpin Plasmid kit (Macherey-Nagel) according to the manufacturer's recommendations.

#### Validation of *E. faecalis* mutant strains by whole genome sequencing

Chromosomal DNA of V19,  $\Delta$ *nagY*,  $\Delta$ 5'*nagY* and  $\Delta$ *hyla* strains was extracted with the Nucleospin Microbial DNA (Macherey-Nagel) according to the manufacturer's recommendations. DNA quantities were measured using a Qubit 4.0 fluorometer (Thermo Fisher Scientific, Waltham, MA, USA) and integrity was checked by electrophoresis. Genomic DNA was sequenced using a MiSeq instrument (Illumina, Inc., San Diego, California) with paired-end and barcode strategy according to the Illumina DNA prep and the Nextera DNA CD Indexes kits (Illumina, Inc., San Diego, California). The libraries were normalized, pooled, then loaded onto the Miseq Reagent Kit V2 (300 cycles). The quality of the reads was checked using FastQC v.0.11.9 (Andrews, 2010). Sequence analysis was performed using the "*CLC Genomics Workbench*" software (version 12.0.2) (CLC Bio, Waltham, MA), with the variant detection tool by comparing with V19 WT sequence and the reference genome of *E. faecalis* V583 (NCBI GenBank: NC\_004668). All programs were used with default parameters.

The sequencing resulted in an output of paired-end read sets containing 3,353,996, 3,254,040, 3,712,254 and 2,882,474 reads for the V19  $\Delta$ *nagY*,  $\Delta$ *hyla*, and  $\Delta$ 5'*nagY* mutant strains, respectively. Differences between WT and mutant strains are listed and discussed in Supplementary Table 3.

## Data availability

Genomes sequences have been deposited in the GenBank database, with the BioProject number PRJNA912900. The Sequence Read Archive (SRA) submission is available under the accession number SRR22763427, SRR22763428, SRR22763429, SRR22763430.

## Phylogenomic analyses

**Pan genomes.** To analyze the pan-genomes, we used two software packages depending on the observed evolutionary distance between genomes. For *Enterococcus* species, *PEPPAN* was chosen because it can reliably construct pan-genomes from genetically diverse bacterial genomes up to an entire genus (Zhou et al., 2020). For the *E. faecalis* strain pan-genome, we selected *Panaroo* (version 1.2.10) which is better suited to address the analysis of strains of the same species and has the advantage of re-analyzing genome sequences to propose gene annotation corrections (Tonkin-Hill et al., 2020). The *match\_identity* parameter from *PEPPAN* controls the minimal identity of an alignment to be considered in the pan-genome construction. Several values were tested and two thresholds were selected: 0.65 for inferring the species tree and a more relaxed value (0.5) for analyzing gene families. *Panaroo* was used with the most conservative mode and with the option to generate alignments of sequences belonging to the core genome with the *mafft* software (parameters: `--clean-mode strict --merge_paralogs --alignment core --aligner mafft --core_threshold 0.95`).

***Enterococcaceae* species tree.** In order to obtain a rooting of the *Enterococcus* tree, we first used an outgroup in addition to the *Enterococcus* genomes using the alignment available in GTDB. Then, we recomputed a tree with only *Enterococcus* sequences and an alignment with a larger number of informative sites. In this way we eliminate the biases induced by the presence of the most divergent sequences and increase the phylogenetic signal to obtain a better estimate of the *Enterococcus* species tree. This tree is then rooted on the node corresponding to the last common *Enterococcus* ancestor identified on the first tree. In practice, we used the 120 single copy markers identified as reliable for phylogenetic inference. To the 81 *Enterococcus* strains, seven representative *Lactobacillales* species obtained from GTDB were included in the sample to act as an outgroup among which one genome from both *Vagococcaceae* and *Carnobacteriaceae* families previously used as outgroup (Lebreton et al., 2017). The tree was calculated with *IQ-TREE* (version 2.2.0) (Minh et al., 2020), with parameters: `-nt AUTO --ufboot 1000 --bnni --alrt 1000` with the LG+F+I+R6 model, and the branch support values were estimated with ultrafast bootstrap approximation (Hoang et al., 2018) and the SH-like approximate likelihood ratio test (Guindon et al., 2010). In Supplementary Figure 1, the subtree composed of two *Enterococcus* sp. from Marseille-P2817 strains (GCA\_900104595.1 and GCA\_005405245.1) is the closest of the *Lactobacillales* group (bootstrap support 100/100) and appears as the outgroup of the *Enterococcus* strains (bootstrap support 99.8/100). Therefore, these two sequences were used to root the *Enterococcus* species tree in Figure 3.

## 2 Supplementary Figures and Tables

**Supplementary Table 1.** Strains and plasmids used in this study.

|         | Name                                   | Characteristics                                                       | Reference            |
|---------|----------------------------------------|-----------------------------------------------------------------------|----------------------|
| Strain  | <i>E. faecalis</i> V19                 | Plasmid-cured strain derived from the V583                            | Paulsen et al., 2003 |
|         | <i>E. faecalis</i> V19 $\Delta$ nagY   | <i>E. faecalis</i> V19 deleted for the <i>nagY</i> gene               | This study           |
|         | <i>E. faecalis</i> V19 $\Delta$ 5'nagY | <i>E. faecalis</i> V19 deleted for the 5' UTR of the <i>nagY</i> gene | This study           |
|         | <i>E. faecalis</i> V19 $\Delta$ hlyA   | <i>E. faecalis</i> V19 deleted for the <i>hlyA</i> gene               | This study           |
|         | <i>E. coli</i> TOP10                   |                                                                       | ThermoFisher         |
|         | <i>E. coli</i> NEB-5 $\alpha$          |                                                                       | New England BioLabs  |
| Plasmid | <i>E. coli</i> M15 pRep4               | <i>E. coli</i> M15 containing the plasmid pRep4, KanR                 | Qiagen               |
|         | pTOPO                                  | KanR                                                                  | ThermoFisher         |
|         | pQE70                                  | AmpR                                                                  | Qiagen               |
|         | pLT06                                  | CmR                                                                   | Thurlow et al., 2009 |

**Supplementary Table 2.** Primers used in this study.

| Name               | Sequence                                             | Use                 |
|--------------------|------------------------------------------------------|---------------------|
| ef1515_SP2         | TATTAAACCCGACGCCTTAC                                 | RACE-PCR            |
| ef1515_SP3         | TTCTCCTGTCTTCGTC AAG                                 | RACE-PCR            |
| ef1515L            | AGTAGCTGTCTGGTAAAGGCG                                | qPCR                |
| ef1515R            | AGTCTTCTGGCTCCATCAC                                  | qPCR, RACE-PCR      |
| ef1515RTL          | GAAAGCTATGAAATCTCAAAA                                | RT-PCR              |
| ef1516RTR          | CATTCATTAGAAAAGTTGTG                                 | RT-PCR              |
| ef1516L            | ATGTGCACGCTCTGAGAAGA                                 | qPCR                |
| ef1516R            | GCCAGCTGTCCAATGCATAA                                 | qPCR                |
| GyrAL              | GATGGGGAAATCAGGGATTC                                 | qPCR                |
| GyrAR              | TCTTTTCCATTCGGCATTTC                                 | qPCR                |
| Ef3023_SP1         | AATCAACAATTAACCATTGTTCA                              | RACE-PCR            |
| Ef3023_SP2         | ACAAATGAGGGTATTTC AAT                                | RACE-PCR            |
| Ef3023_SP3         | TAAGCATGAAAGCAACAACGA                                | RACE-PCR            |
| pLT06_1_bis        | GAATTCGAGCTCGGTACC                                   | Mutant construction |
| pLT06_2            | CTGCAGGTCGATAAAACCC                                  | Mutant construction |
| ef1515_1           | ACGATCCCCGGGTACCGAGCTCGAATTCAAAAGTCTATTCTTACGTT      | Mutant construction |
| ef1515_2           | TCAATGTGAATCGATGTCAAGAACAAGTACAGCATTT                | Mutant construction |
| ef1515_3           | TGTA CTTGTCTTGACATCGATTACATTGAACGA                   | Mutant construction |
| ef1515_4           | GTTTCGCTGGGTTTATCGACCTGCAGTTCAAACCTAAGAAGAAGTCTACAA  | Mutant construction |
| ef1515_6           | CCAACATCATTGGATGATTCG                                | Mutant construction |
| ef3023_1           | ATCCCCGGGTACCGAGCTCGAATTC TAGGTGAAAATTA AACTAGTAACAG | Mutant construction |
| ef3023_2           | CGATAACTAGAAGACATGAAAGCAACAACGACTATTA                | Mutant construction |
| ef3023_3           | CGTTGTGCTTTCATGTCTTCTAGTTATCGCCAGT                   | Mutant construction |
| ef3023_4           | ATGGTTCGCTGGGTTTATCGACCTGCAGCTTTAATGTGTCGTTATCTGA    | Mutant construction |
| ef3023_5           | GTGGAAAAGTAGCCAAACTTC                                | Mutant construction |
| ef3023_6           | TGGAATTGTGGGCTATAGC                                  | Mutant construction |
| topo_FP2           | GAATTC CAGCACACTGG                                   | pTOPO cloning       |
| topo_RP2           | CTATAGTGAGTCGTATTACA                                 | pTOPO cloning       |
| topo65_FP1         | TAATACGACTCACTATAGTATCATAATAAAGGAGGTGAAAT            | pTOPO cloning       |
| topo65_RP1         | AGTGTGCTGGAATTC AATTTATAATTTGTGTTATACTAAG            | pTOPO cloning       |
| topo85_FP1         | TAATACGACTCACTATAGTTAACA AATGAATAGCGTTTTTC           | pTOPO cloning       |
| topo85_RP1         | AGTGTGCTGGAATTCATGACCCTCTCTGCAGAA                    | pTOPO cloning       |
| topo5'3023_FP1     | TAATACGACTCACTATAGCGTAAACATGTATAATATTTTCATG          | pTOPO cloning       |
| topo5'3023_RP1     | AGTGTGCTGGAATTC AATCCGACTTTTCCAAACAC                 | pTOPO cloning       |
| ef1515_pQE70_SphI  | TACGCATGCGAATTA AAAAGGTGCTAAAATCAAAA                 | pQE70 cloning       |
| ef1515_pQE70_BglII | ATGAGATCTTTTGGTCAATTCCTTAATCGTTCA                    | pQE70 cloning       |

**Supplementary Table 3.** Results of the variant detection analysis of the genomes of mutants constructed in this study. SNV : Single Nucleotide Variant.

| Mutant           | Genome Position | Location and annotation                                                                                                                   | Variant type | Nucleotide and amino-acid changes | Comments                                                                                                            |
|------------------|-----------------|-------------------------------------------------------------------------------------------------------------------------------------------|--------------|-----------------------------------|---------------------------------------------------------------------------------------------------------------------|
| $\Delta nagY$    | 2920112         | <i>ef3044/EF_RS14425</i><br><i>nagA</i> N-acetylglucosamine-6-phosphate deacetylase                                                       | SNV          | TGT to TGC<br>Cys to Cys          | No amino-acid change                                                                                                |
| $\Delta hylA$    | 3016608         | <i>ef3144/EF_RS14890</i><br>MurR/RpiR family transcriptional regulator                                                                    | SNV          | AAC to AAT<br>Asn to Asn          | No amino-acid change                                                                                                |
|                  | 2835039         | <i>ef2962/EF_RS14050</i> LacI family transcriptional regulator                                                                            | SNV          | TCC to TCA<br>Ser to Ser          | No amino-acid change                                                                                                |
| $\Delta 5' nagY$ | 134299          | Between<br><i>ef0129/EF_RS00580</i><br>helix-turn-helix transcriptional regulator<br>and <i>ef0130/EF_RS00585</i><br>hypothetical protein | SNV          | G to T                            | <i>ef0129</i> and <i>ef0130</i> and are not co-transcribed. Mutation is not located in 5' and 3'UTR of these genes. |

**Supplementary Table 4.** *Enterococcaceae* reference species used in this study. .xlsx file.

**Supplementary Table 5.** *Enterococcaceae* orthologous genes. .xlsx file.

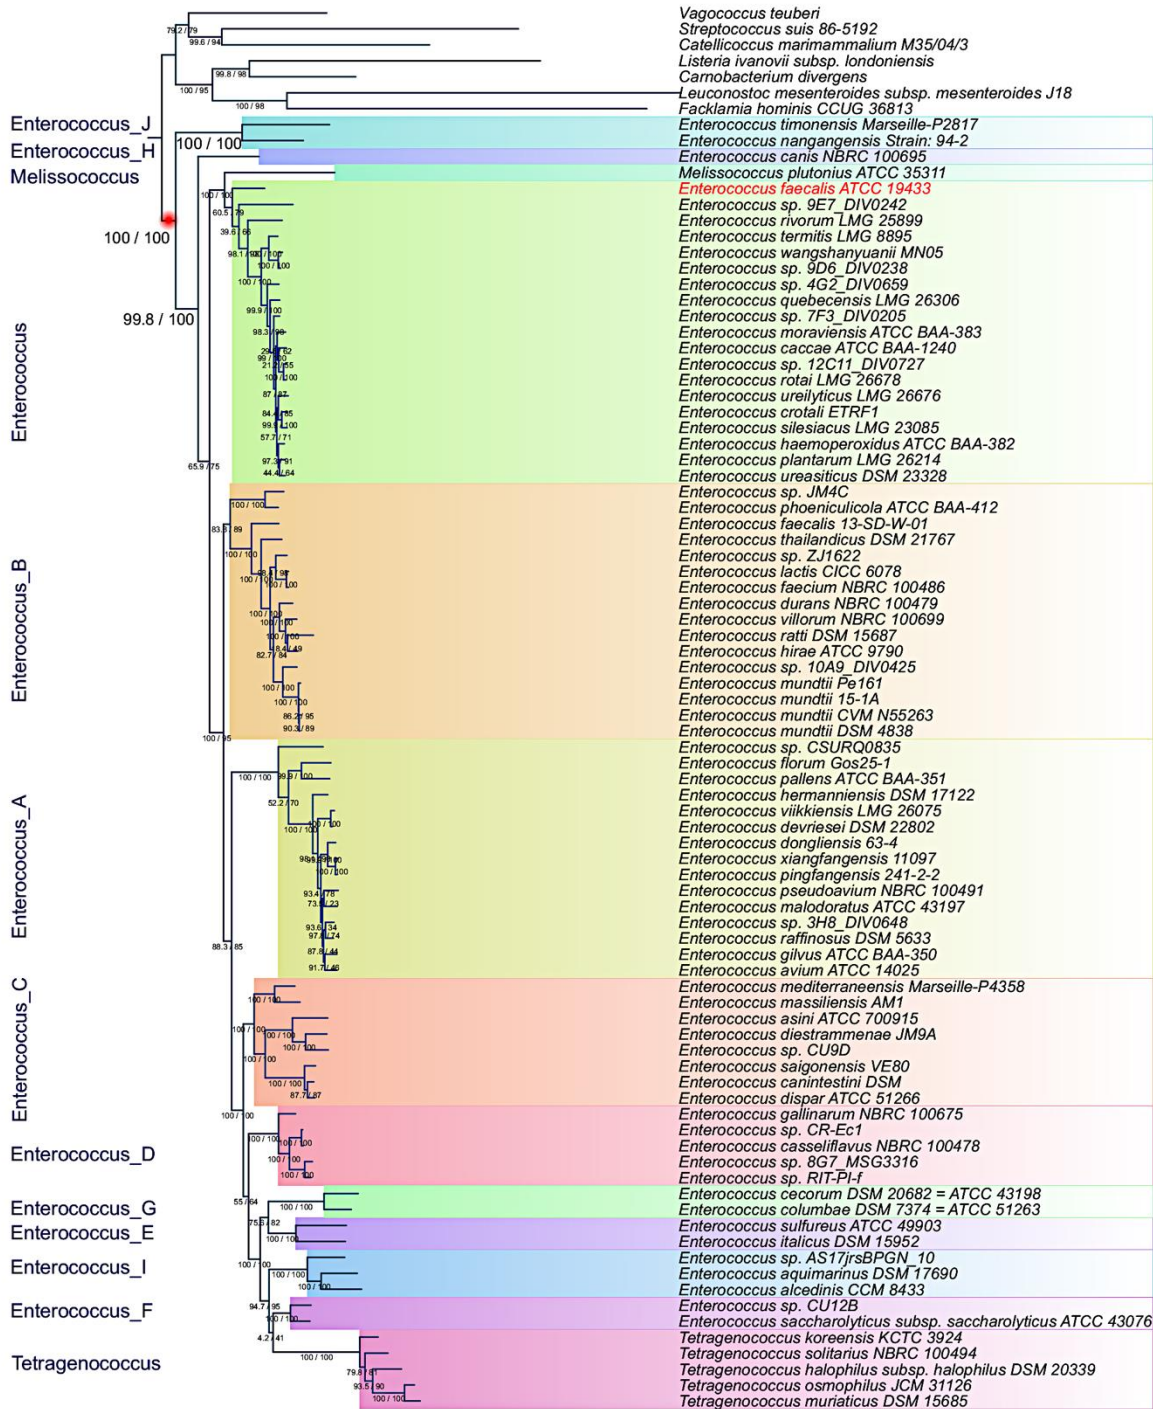

**Supplementary Figure 1. *Enterococcaceae* species tree with *Lactobacillales* species as outgroup.**

The tree inferred with the 120 single copy markers (Parks et al., 2017) and rooted with seven representative *Lactobacillales* species obtained from GTDB. A red dot indicates the position of the last common ancestor of the *Enterococcaceae*. This node is perfectly resolved (100/100, *ufboot/alrt* supports). A color palette is associated with *Enterococcus* genera in the GTDB. The trees were drawn with *iTOL* (Letunic and Bork, 2021).

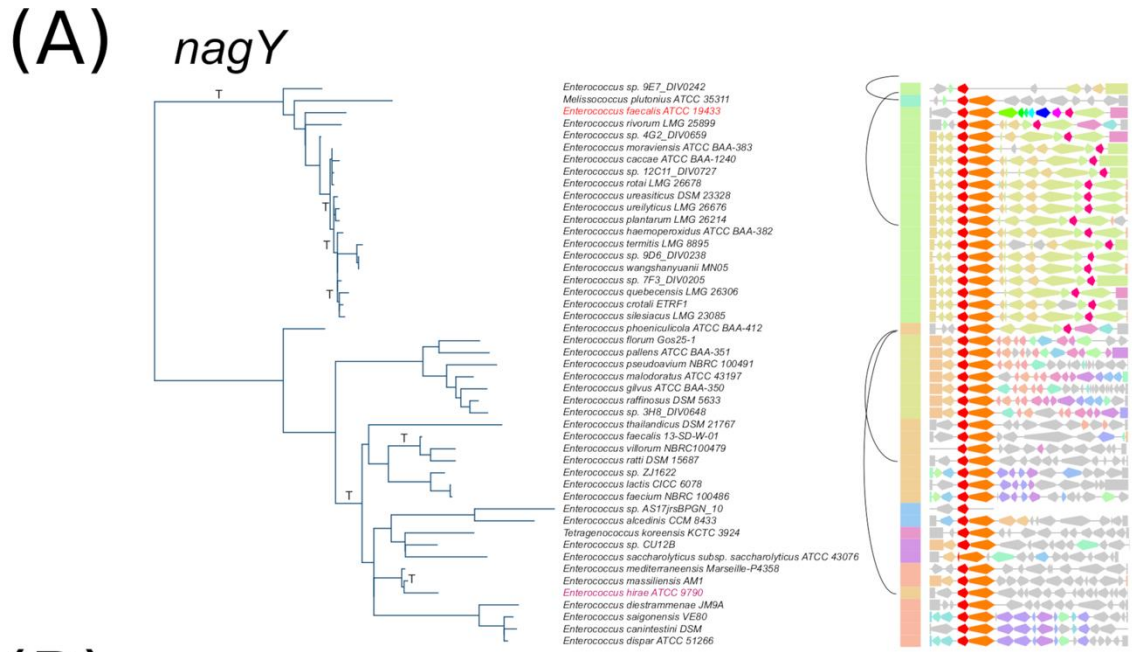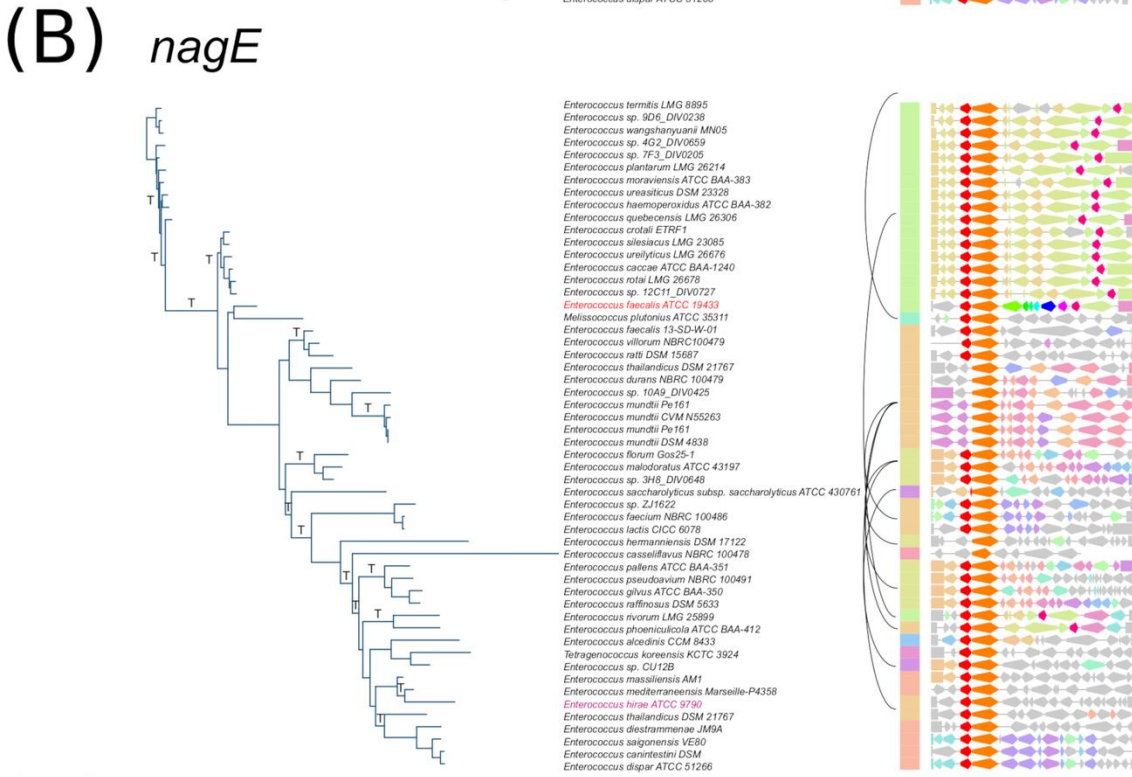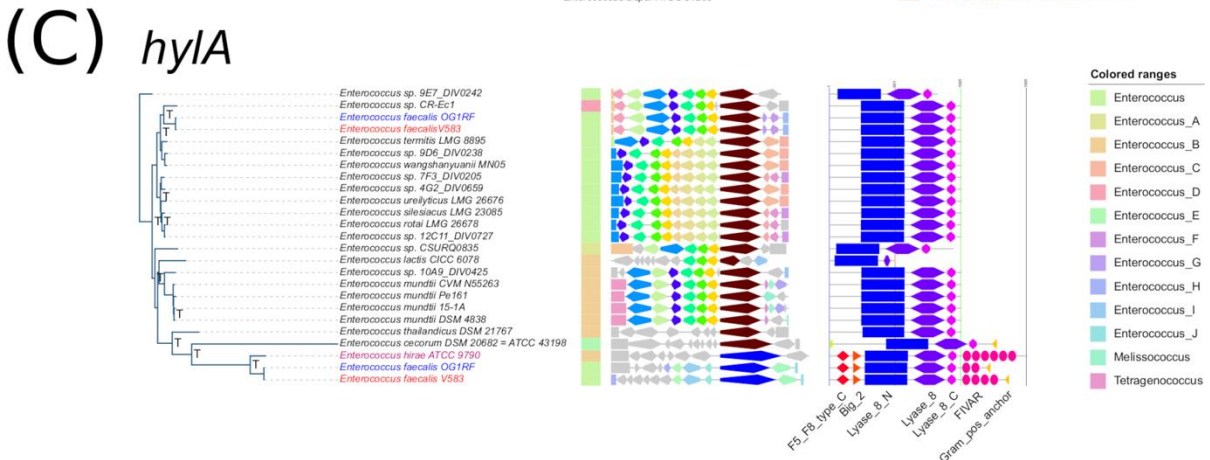

**Supplementary Figure 2. Family trees for *nagY*, *nagE* and *hlyA* with gene neighborhood.** The three panels correspond to the (A) *nagY* orthologs, (B) *nagE* orthologs and (C) *hlyA* homologs. Reconciled protein family trees were inferred with *GeneRax*, with the species tree and family alignment as input. The method takes into account the amino acids substitution model, duplications, losses and gene transfers. Predicted gene transfers are reported on the branches (T). The first column describes the taxonomy of the species corresponding to the proteins on the tree using the same color code as in Figure 3. The braces indicate inter-genera transfers. The chromosomal neighborhood of the genes is displayed alongside with a color code referring to the OGs of each gene that highlights the conservation. For the *hlyA* homologs, the Pfam domain organization of the encoded proteins is shown.

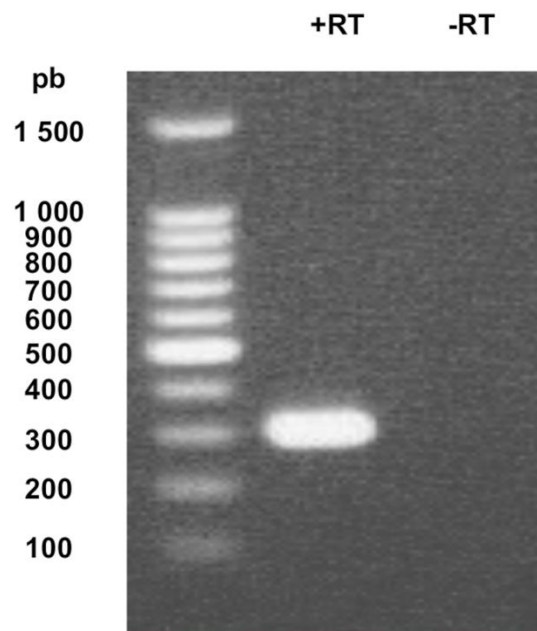

**Supplementary Figure 3. Co-transcription of *nagY-nagE* operon evidenced by RT-PCR.** RNAs were extracted from *E. faecalis* V19 strain in exponential culture phase, cultivated in cdM17 with 0.5% glucose. +/-RT: with or without addition of reverse transcriptase. Size of DNA ladder is indicated.

(A)

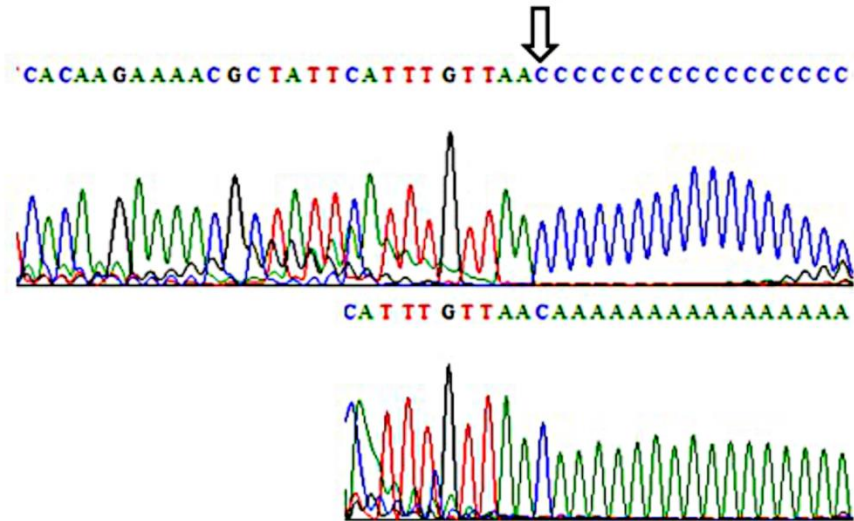

(B)

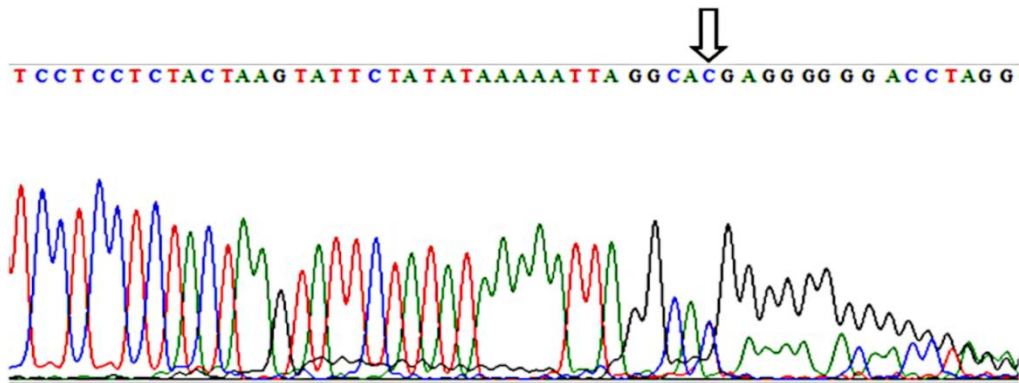

**Supplementary Figure 4. Identification of the *nagY* and *hylA* transcription start site by 5'RACE-PCR assay.** (A) *nagY-nagE* +1 of transcription was identified with a polyC and a polyA during RACE-PCR because of ambiguities on the C base (B) *hylA* +1 of transcription was identified with polyG. Transcriptional start sites are designed by arrows.



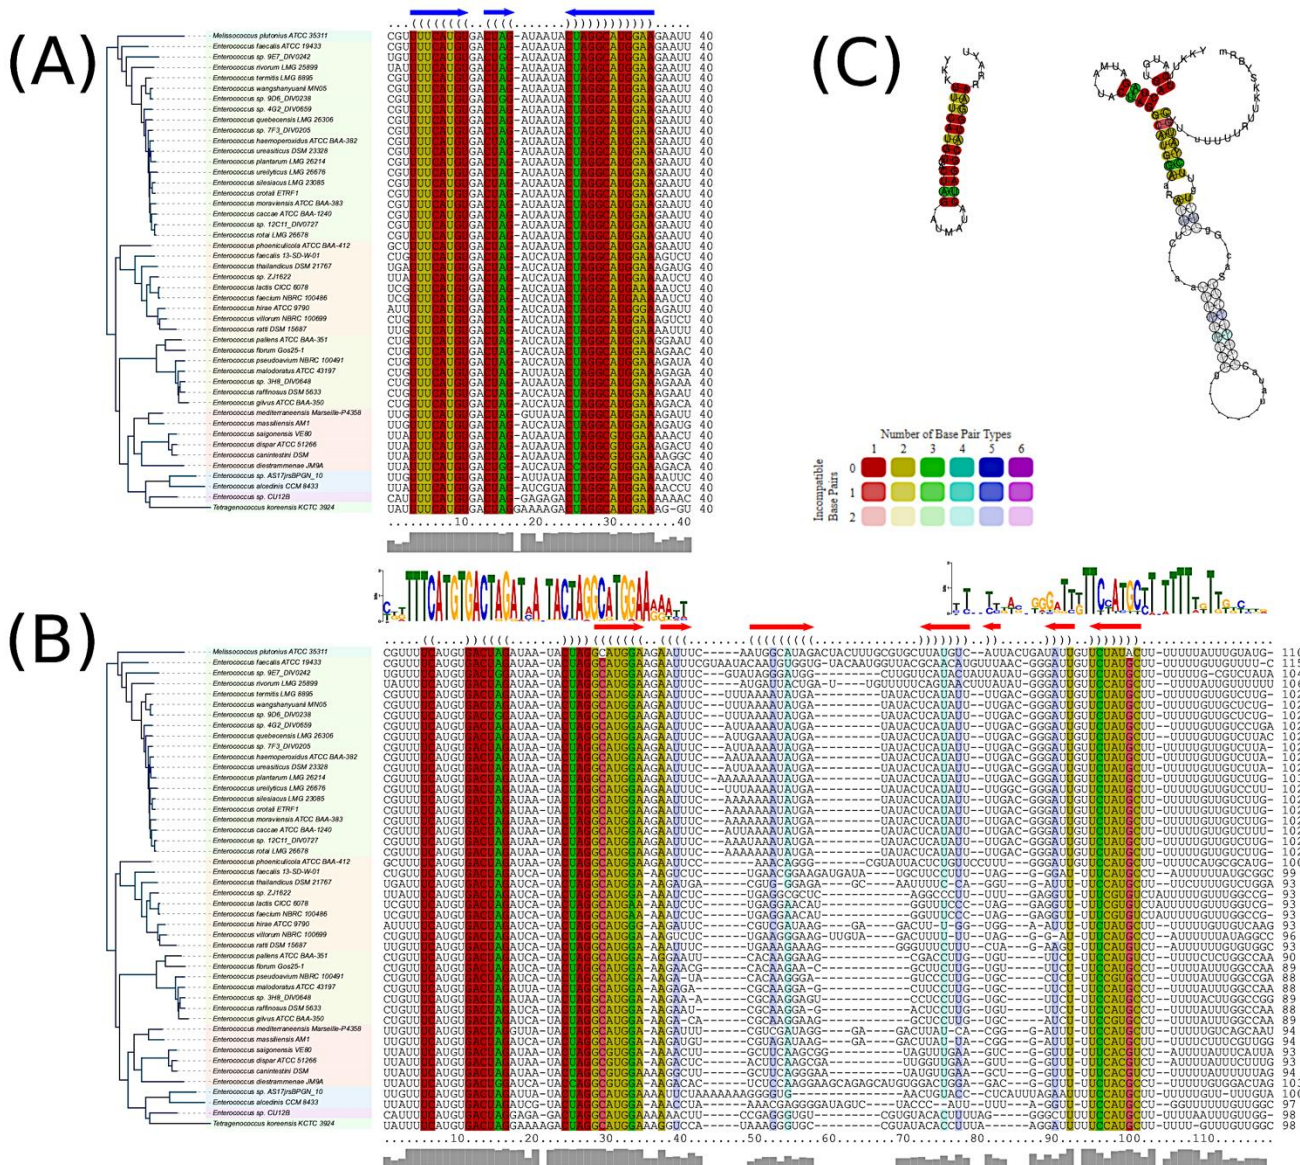

**Supplementary Figure 5. Alignments and secondary structure of the RAT motifs and the rho-independent transcription terminator in enterococci.** Sequences are ordered according to the species tree (Figure 3). Base pairs are indicated by parentheses. Consensus secondary structures are marked with arrows. In the alignments, colors indicate compatible base pairs. The shade shows the number of different types of C-G, G-C, A-U, U-A, G-U or U-G compatible base pairs in the corresponding columns. The hue shows the conservation of the base pair sequence. The saturation decreases with the number of incompatible base pairs. This coding reflects the structural conservation of the base pair. **(A)** Predicted alignment and structure for the RAT region. **(B)** Predicted alignment and structure for the rho-independent transcription terminator. The sequence logo from *MEME* motif 1 and 2 were placed above the alignment. Spaces (-) have been inserted into the logo to match the alignment. **(C)** Consensus secondary structures of region in A on the left, and in B on the right.

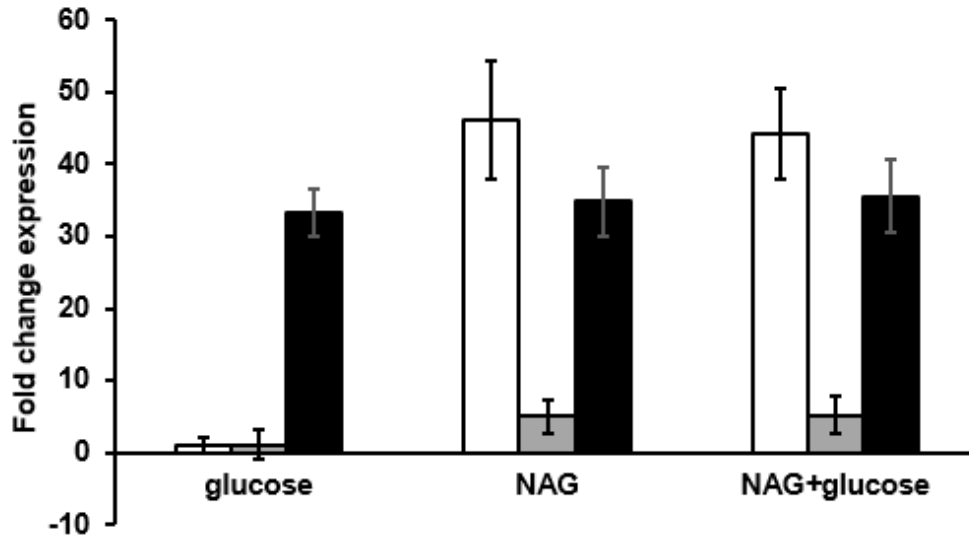

**Supplementary Figure 6. Study of *nagE* induction of expression in presence of NAG or/and glucose.** The *nagE* gene expression in WT (white),  $\Delta nagY$  (grey), and  $\Delta 5' nagY$  (black) strains were revealed by RT-qPCR, with RNA purified from culture in presence of NAG or/and glucose as sole carbon source. The results were normalized with the expression of the housekeeping gene *gyrA* (gyrase). Error bars represent the standard error of triplicate measurements.

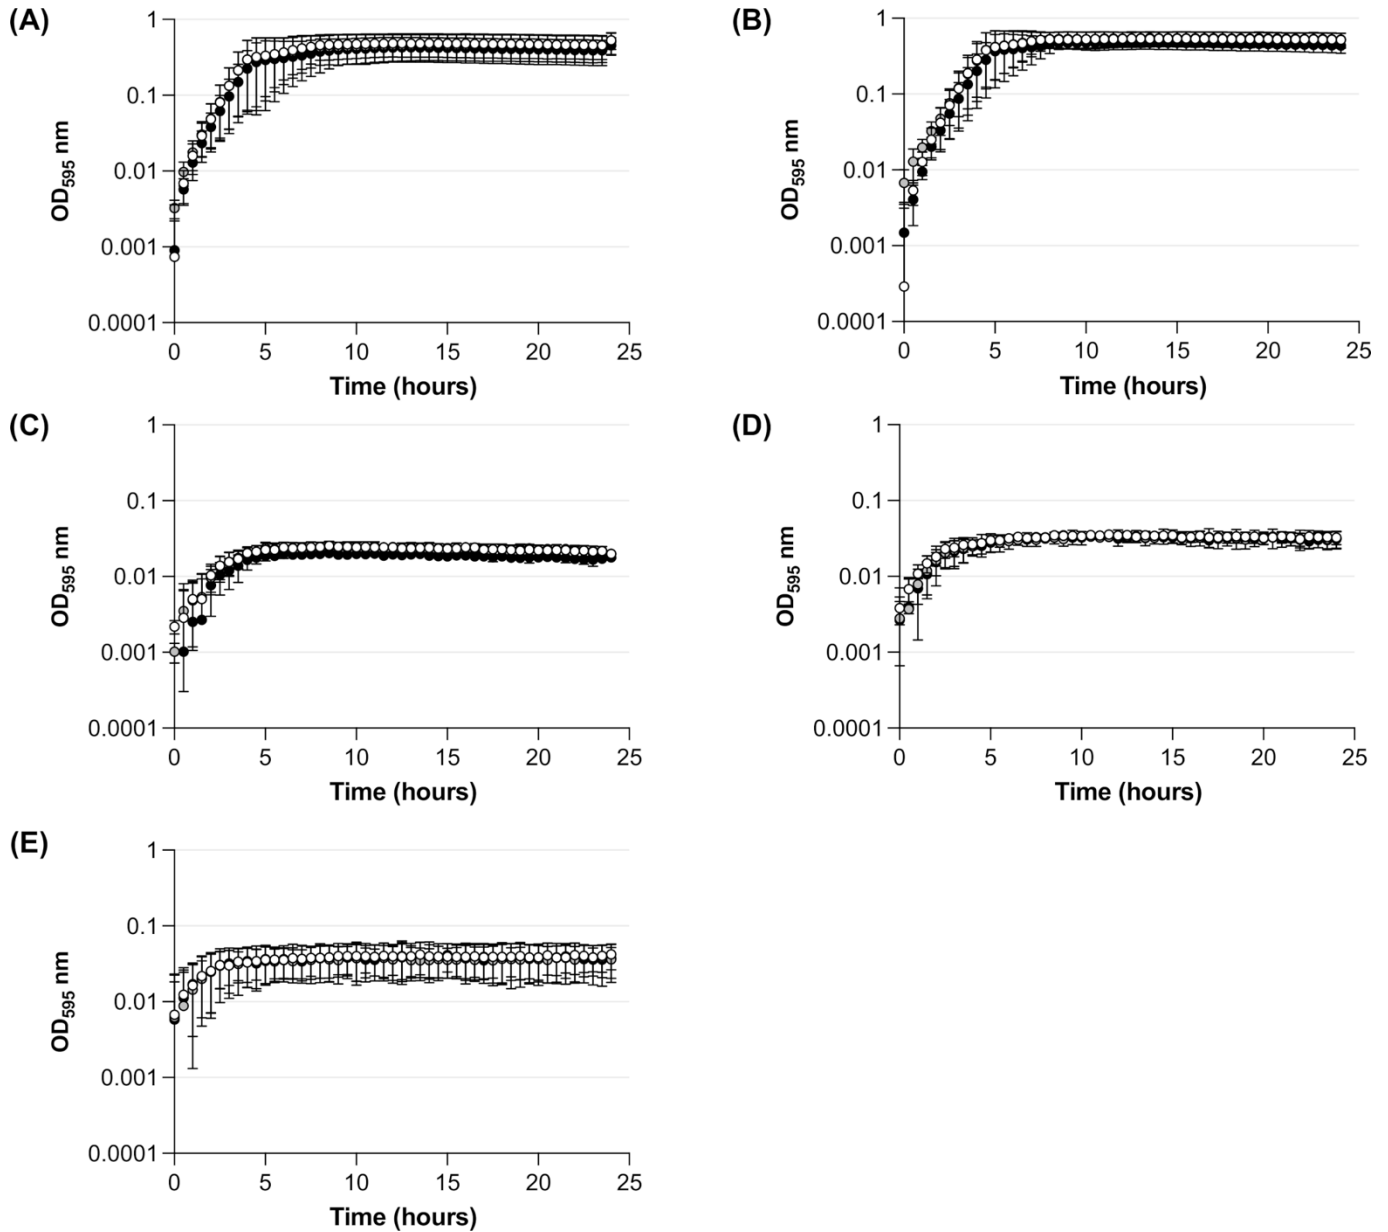

**Supplementary Figure 7. Growth experiments in WT (white), *AnagY* (grey) and *AhylA* (black) strains with 0.5% (A) glucose, (B) NAG, (C) hyaluronic acid, (D) chondroitin sulfate or (E) heparin sodium. Error bars represent the standard error of at least 2 measurements.**

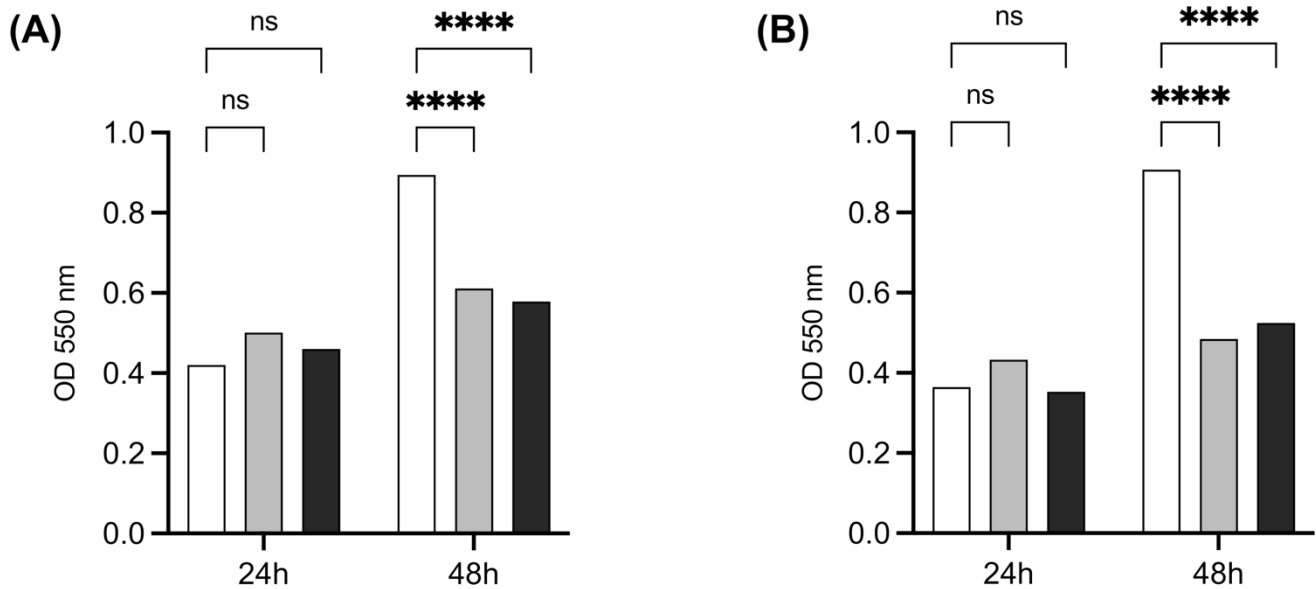

**Supplementary Figure 8. Biofilm formation in WT (white),  $\Delta nagY$  (grey) and  $\Delta hylA$  (black) strains** with the corresponding observation of crystal violet staining.  $p$ -value  $<0.0001$  (Tukey's multiple comparisons test). A coating with  $1 \mu\text{g/mL}$  of chondroitin sulfate (**A**) or heparin sodium (**B**) was performed before biofilm formation. The experiments were realized three times.

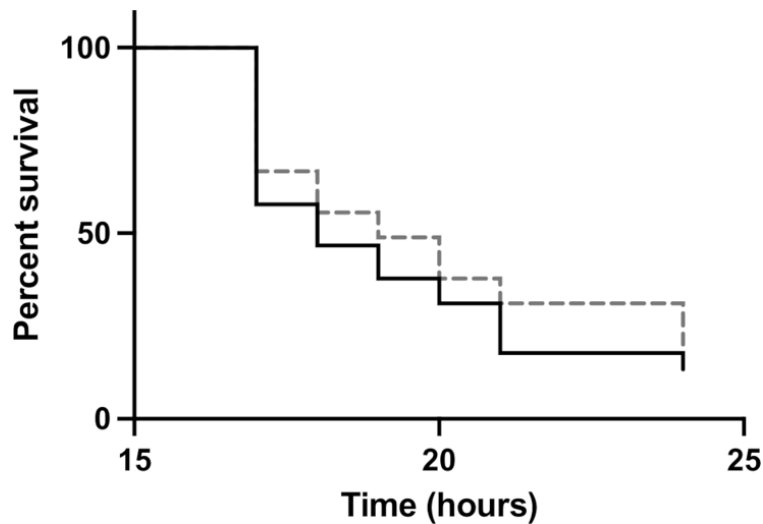

**Supplementary Figure 9. Survival of *G. mellonella* larvae infected by *E. faecalis* WT (solid line) and  $\Delta nagY$  (dashed grey line) strains.** The experiment was performed three times using 15 caterpillars per strain and per test. No significant difference was observed (log-rank test).

## References

- Andrews, S. (2010). FastQC. Available at: <https://www.bioinformatics.babraham.ac.uk/projects/fastqc/>.
- Guindon, S., Dufayard, J.-F., Lefort, V., Anisimova, M., Hordijk, W., and Gascuel, O. (2010). New algorithms and methods to estimate maximum-likelihood phylogenies: assessing the performance of *PhyML* 3.0. *Syst Biol* 59, 307–321. doi: 10.1093/sysbio/syq010.
- Hoang, D. T., Chernomor, O., von Haeseler, A., Minh, B. Q., and Vinh, L. S. (2018). *UFBoot2*: improving the ultrafast bootstrap approximation. *Mol Biol Evol* 35, 518–522. doi: 10.1093/molbev/msx281.
- La Carbona, S., Sauvageot, N., Giard, J.-C., Benachour, A., Posteraro, B., Auffray, Y., et al. (2007). Comparative study of the physiological roles of three peroxidases (NADH peroxidase, Alkyl hydroperoxide reductase and Thiol peroxidase) in oxidative stress response, survival inside macrophages and virulence of *Enterococcus faecalis*. *Mol. Microbiol.* 66, 1148–1163. doi: 10.1111/j.1365-2958.2007.05987.x.
- Lebreton, F., Manson, A. L., Saavedra, J. T., Straub, T. J., Earl, A. M., and Gilmore, M. S. (2017). Tracing the enterococci from Paleozoic origins to the hospital. *Cell* 169, 849–861.e13. doi: 10.1016/j.cell.2017.04.027.
- Letunic, I., and Bork, P. (2021). Interactive Tree Of Life (*iTOL*) v5: an online tool for phylogenetic tree display and annotation. *Nucleic Acids Res* 49, W293–W296. doi: 10.1093/nar/gkab301.
- Minh, B. Q., Schmidt, H. A., Chernomor, O., Schrempf, D., Woodhams, M. D., von Haeseler, A., et al. (2020). *IQ-TREE 2*: new models and efficient methods for phylogenetic inference in the genomic era. *Mol Biol Evol* 37, 1530–1534. doi: 10.1093/molbev/msaa015.
- Parks, D. H., Rinke, C., Chuvochina, M., Chaumeil, P.-A., Woodcroft, B. J., Evans, P. N., et al. (2017). Recovery of nearly 8,000 metagenome-assembled genomes substantially expands the tree of life. *Nat Microbiol* 2, 1533–1542. doi: 10.1038/s41564-017-0012-7.
- Paulsen, I. T., Banerjee, L., Myers, G. S. A., Nelson, K. E., Seshadri, R., Read, T. D., et al. (2003). Role of mobile DNA in the evolution of vancomycin-resistant *Enterococcus faecalis*. *Science* 299, 2071–2074. doi: 10.1126/science.1080613.
- Thurlow, L. R., Thomas, V. C., and Hancock, L. E. (2009). Capsular polysaccharide production in *Enterococcus faecalis* and contribution of CpsF to capsule serospecificity. *J Bacteriol* 191, 6203–6210. doi: 10.1128/JB.00592-09.
- Tonkin-Hill, G., MacAlasdair, N., Ruis, C., Weimann, A., Horesh, G., Lees, J. A., et al. (2020). Producing polished prokaryotic pangenomes with the *Panaroo* pipeline. *Genome Biol* 21, 180. doi: 10.1186/s13059-020-02090-4.
- Zhou, Z., Charlesworth, J., and Achtman, M. (2020). Accurate reconstruction of bacterial pan- and core genomes with *PEPPAN*. *Genome Res* 30, 1667–1679. doi: 10.1101/gr.260828.120.
